1

## Is it the same strain?

2 **Defining genomic epidemiology thresholds tailored to individual outbreaks**

3

### 4 **Authors**

5 Audrey Duval, PhD<sup>1,2,3</sup>, Lulla Opatowski, PhD<sup>1,2</sup> and Sylvain Brisse, PhD<sup>3</sup>

### 6 **Affiliations**

7 <sup>1</sup>Epidemiology and modelling of bacterial escape to antimicrobials, Institut Pasteur, Paris,  
8 France.

9 <sup>2</sup>Anti-infective Evasion and Pharmacoepidemiology Team, CESP, Université Paris-Saclay,  
10 UVSQ, INSERM U1018, Montigny-le-Bretonneux, France.

11 <sup>3</sup> Institut Pasteur, Biodiversity and Epidemiology of Bacterial Pathogens, Paris, France

12

### 13 **Correspondence**

14 **Sylvain Brisse:** Institut Pasteur, Biodiversity and Epidemiology of Bacterial Pathogens,

15 28 rue du Docteur Roux, F-75724 Paris, France. Phone: +33 1 45 68 83 34 ; E-mail:

16 [sylvain.brisse@pasteur.fr](mailto:sylvain.brisse@pasteur.fr)

17

18 **Keywords:** genomic epidemiology; outbreak genetic threshold; point-source outbreaks; strain

19 definition

20

## Abstract

### 21 **Background**

22 Epidemiological surveillance relies on microbial strain typing, which defines genomic  
23 relatedness among isolates to identify case clusters and their potential sources. No consensus  
24 exists on the choice of thresholds of genomic relatedness to define clusters. While *a priori*  
25 defined thresholds are often applied, outbreak-specific features such as pathogen mutation  
26 rate and duration of source contamination should be considered.

### 27 **Methods**

28 We developed a forward model of bacterial evolution to simulate mutation within a  
29 population diversifying at a specific mutation rate, with specific outbreak duration and sample  
30 isolation dates. Based on the resulting expected distribution of genetic distances we define a  
31 threshold beyond which isolates are considered as not part of the outbreak. We additionally  
32 embedded the model into a Markov Chain Monte Carlo inference framework to estimate,  
33 from data including sampling dates or isolates genetic variation, the most credible mutation  
34 rate or time since source contamination.

### 35 **Findings**

36 A simulation study validated the model over realistic durations and mutation rates. When  
37 applied to 16 published datasets describing foodborne outbreaks, our framework consistently  
38 identified outliers. Appropriate thresholds for grouping cases were obtained for 14 outbreaks.  
39 For the remaining two outbreaks, re-estimation of the duration of outbreak lead to updated  
40 threshold values and was more likely, given our model, to result in the observed genetic  
41 distances.

### 42 **Interpretation**

43 We propose an evolutionary approach to the ‘single strain’ conundrum by defining the genetic  
44 threshold based on individual outbreak properties. The framework provides an informed  
45 estimation of the likelihood of a cluster given the samples epidemiological and  
46 microbiological context. This forward model, applicable to foodborne or environmental-  
47 source single point case clusters or outbreaks, will be useful for epidemiological surveillance  
48 and to guide control measures.

### 49 **Funding**

50 This work was supported financially by the MedVetKlebs project, a component of European  
51 Joint Programme One Health EJP, which has received funding from the European Union's  
52 Horizon 2020 research and innovation programme under Grant Agreement No 773830. The  
53 funders had no role in study design, data collection and analysis, decision to publish, or  
54 preparation of the manuscript.

55

## 56 **Research in context**

### 57 **Evidence before this study**

58 We searched PubMed for studies published between database inception and April 3, 2021,  
59 with the term (threshold OR cut-off OR genetic relatedness) AND (outbreak) AND (cgMLST  
60 OR wgMLST OR SNPs) AND (microbial OR bacteria OR bacterial OR pathogen). We found  
61 222 related articles. Most studies define a fixed SNP threshold that relate outbreak strains  
62 based on previous observations. One original study identifies outbreak clusters based on  
63 transmission events. However, it relies on strong assumptions about molecular clock and  
64 transmission processes.

### 65 **Added value of this study**

66 Our study describes a new method based on a forward Wright-Fisher model to find the most  
67 credible genetic distance threshold. This method is fast and simple to use with only few  
68 assumptions, informed by outbreak duration and pathogen mutation rate. By using SNP or  
69 cgMLST pairwise distances and sample collection dates of the outbreak of interest, the  
70 algorithm provides context-based guidance to separate outbreak strains from outliers.

### 71 **Implications of all the available evidence**

72 The fast and easy method developed here enables to move away from *a priori* defined  
73 thresholds. Defining clusters more accurately based on the specific features of outbreaks, and  
74 the ability to estimate outbreak duration, will provide the needed precision for  
75 epidemiological surveillance and should contribute to leverage molecular epidemiology data  
76 more efficiently for the purpose of uncovering contamination sources.

77

## 78 **Data Availability Statement**

79 All data and code used for this manuscript is available online at <https://gitlab.pasteur.fr/BEBP>.

## 80 **Introduction**

81 Outbreaks of infections caused by the exposure to a unique source are the particular focus of  
82 surveillance and infection control strategies. The rapid identification of the source can lead to  
83 immediate public health benefits and is therefore critical. In the simplest cases, a single strain  
84 of infectious agent contaminates the source and subsequently causes infections (referred to as  
85 a ‘clonal outbreak’). This is often the case for contaminated food, water or environmental  
86 sources that are under strong regulatory measures and typically uncontaminated. Surveillance  
87 systems were therefore put in place, *e.g.*, for food-borne pathogens such as *Salmonella* or  
88 *Listeria monocytogenes*, based on a collect-genotype-compare strategy [1,2]. This strategy,  
89 dubbed ‘reverse epidemiology’ [3], forms the basis of surveillance systems for foodborne  
90 pathogens, such as PulseNet [1]. Molecular surveillance (‘genetic fingerprinting’) enables the  
91 detection of nearly identical infectious agent isolates and may trigger epidemiological  
92 investigations. These include the search for case-associated risk factors as well as  
93 microbiological analyses of suspected sources, and may lead to infection control measures  
94 that can prevent further infections.

95 Distinguishing case cluster isolates from sporadic ones has been the ‘Holy Grail’ of molecular  
96 epidemiological surveillance. However, the identification of single-strain clusters of  
97 infections is confounded by a background of sporadic cases caused by exposure to unrelated  
98 sources. Defining ‘a single strain’ typically involves the use of a threshold of genetic distance,  
99 which discriminates between isolates that are related or not to the event. The literature is ripe  
100 with attempts to define such thresholds [4]. In the whole-genome sequencing (WGS) era,  
101 thresholds were refined compared to pre-genomic methods such as PFGE [5–10]. Usually,  
102 threshold definition is based on the variability observed within previously well-characterised  
103 outbreaks, an approach rooted in the epidemiological concordance principle [11]. However,  
104 interpretation of molecular data for strain definition is far from being consensual [5,12,13].

105 From an evolutionary biology point of view, infectious agents that are present as  
106 contaminants of an initially sterile source can be considered as subpopulations of individuals  
107 that have evolved from a single common ancestor (the original strain) since some time (the  
108 duration of contamination). Major factors expected to influence the genetic distances among  
109 sampled individuals (isolates) include: i) the duration of strain persistence in the contaminated  
110 source prior to infections; ii) the evolutionary rate of the pathogen genomic markers; iii) the  
111 sampling dates. On the other hand, the genetic distance to the closest observed isolate

112 unrelated by source will be determined by which genomes were sampled outside the  
113 contamination event. All these parameters considered, the quest for a unique threshold  
114 applicable to all outbreaks is deemed to fail. Instead, using outbreak-specific thresholds  
115 defined based on their context-informed expected diversity is likely to represent a more  
116 successful strategy. Attempts to ground threshold definition in evolutionary biology are recent  
117 and used the coalescent model [6], transmission models [14] and Bayesian MRCA models  
118 [15,16].

119 The aim of this work was the development of a novel model to define the most credible  
120 genetic distance cut-offs for single strain outbreaks from a contaminated source, by simulating  
121 the accumulation of mutations using specific outbreak parameters.

## 122 **Methods**

### 123 **Evolutionary model and definition of the outbreak genetic distance threshold**

124 We define an outbreak (or cluster of cases) as a group of infection cases caused by a single  
125 strain ('monoclonal'), excluding co-occurring cases caused by genetically unrelated strains  
126 (*i.e.*, from other sources). In the case where two or more genetically unrelated strains co-  
127 contaminate the source of the outbreak, they should be analysed separately with this  
128 framework.

129 Our evolutionary formalization (**Figure 1A**) is based on a Wright-Fisher forward model of  
130 haploid infectious agent evolution [17,18] with constant population size. The simulation is  
131 initialised with a homogeneous population of an infectious agent characterised by five  
132 properties: i)  $L$ , the genome length (base pairs, bp) or the average length of genes of  
133 multilocus sequence typing [MLST] approaches; ii)  $g$ , the number of genes; iii)  $\mu$ , the number  
134 of substitutions per site per year; iv)  $D$ , the duration (in days) of the outbreak, defined as the  
135 time elapsed between the initial contamination of the source, and the sampling date of the last  
136 isolate; and v)  $S_d$ , the set of sampling dates of isolates, which is defined either directly from  
137 the source sampling dates or from the date of sampling of infections, in which case the  
138 incubation time and within-patient evolution is neglected. Substitutions are introduced at each  
139 time step in individuals sampled with replacement according to a uniform distribution  
140 (Poisson distribution with parameter  $\lambda$ ). A distribution of pairwise genetic distances is  
141 generated on these sampled individuals, and the genetic threshold value is defined from this  
142 distribution. Details of the model are provided in the **Supplementary Appendix**.

143

### 144 **Analysis of published outbreak datasets**

145 We reviewed available published outbreak datasets from the literature and analysed the 16  
146 datasets listed in **Table 1** [6,19–24] using our modelling framework. Inclusion criteria were i)  
147 foodborne outbreak; ii) the availability of whole genome sequence data and iii) availability of  
148 collection dates of isolates. The 16 outbreaks are described in more details in the  
149 **supplementary appendix**. We estimated  $D$  based on evidence provided in the original  
150 publications on these outbreaks. We also used previously estimated  $\mu$  and  $g$  for the  
151 corresponding infectious agent from literature (**Table 1**). We labelled  $D$  and  $\mu$  values taken

152 from the literature as  $D_{lit}$  and  $\mu_{lit}$ , whereas those derived from our Markov Chain Monte Carlo  
153 (MCMC) estimation (see below) were labelled as  $D_{estimated}$  and  $\mu_{estimated}$ .

154

## 155 **Statistical analyses, simulation studies and statistical framework**

156 *Model assessment.* To assess the capacity of the model to adequately tell apart outbreak  
157 isolates from non-outbreak isolates, we used synthetic datasets generated with different  
158 parameters values. We applied our framework to a series of 171 simulated outbreaks  
159 generated with 19 different values of  $D$  each combined with 9 values of  $\mu$  and including  
160 simulated sporadic isolates (**Table S1** in the supplementary appendix). For each of them, we  
161 assessed the global sensitivity ( $Se$ ) and specificity ( $Sp$ ) of the framework. Details are provided  
162 in the **Supplementary Appendix**.

163 *Parameters estimation.* Our model was embedded into a Bayesian inference statistical  
164 framework to enable estimation of either the duration ( $D$ ) or the substitution rate ( $\mu$ ) of  
165 studied outbreaks (**Figure 1B; Supplementary appendix**). Simulated outbreaks were used to  
166 assess the ability of the model to estimate  $D$  and  $\mu$ , and their impact on the genetic threshold  
167 estimation. We used the Kolmogorov-Smirnoff test statistic (noted  $D_{KS}$ ) to compare real  
168 distributions with simulated distributions as a goodness of fit indicator. Details on the  
169 inference framework are provided in the **Supplementary Appendix**.

170

## 171 **Role of the funding source**

172 The funding source did not have an involvement in either study design, collection, analysis, or  
173 interpretation of the data.



## 174 Results

### 175 Analysis of simulated outbreaks: accuracy of outbreak delineation and of parameters 176 estimation

177 To test the ability of the framework in distinguishing between outbreak and non-outbreak  
178 cases, we generated synthetic outbreaks from different combinations of  $D$  and  $\mu$  (**Table S1 in**  
179 **the supplementary appendix**). **Figure 2** shows the specificity  $S_p$  and sensitivity  $S_e$   
180 according to  $\mu$ .  $S_p$  was poor with low  $\mu$  values, especially when  $R_d$  (the ratio of evolution  
181 duration between outbreak and non-outbreak genomes) was small (**Figure 2A**). In contrast,  $S_e$   
182 was always high (more than 99%, **Figure 2B**), irrespective of the parameter's combinations.  
183 We observed that the higher  $R_d$  and  $\mu$  were, the lower this 95%  $S_p$   $D$ -value threshold was  
184 (**Figure 2C**).

185 We next evaluated whether the model and framework could accurately estimate the  
186 parameters  $D$  and  $\mu$  from outbreaks data. To do so, we simulated synthetic outbreaks for  
187 which the  $D$  and  $\mu$  values were known, and attempted to estimate one or the other. Regarding  
188  $D$  estimation, all HPD include the true value, with higher values of  $D$  being associated with  
189 smaller 95% HPD (**Figure 3A**). Similarly,  $\mu$  was adequately estimated, with best estimates  
190 being closer to the target value for higher  $\mu$  values (**Figure 3B**).  
191 Because higher  $D$  and/or  $\mu$  values lead in average to more SNPs, we indeed expected more  
192 precision in HPDs estimates in these cases.

193 We also investigated the impact of sampling density on estimation accuracy. Results suggest  
194 that poor sampling densities (*e.g.*, 5%), when associated to low values of  $D$  and  $\mu$  (therefore  
195 resulting in a low genetic diversity among samples), resulted in biased estimations of  $D$  and  $\mu$ ,  
196 which were generally overestimated (**Figure 4A** and **4B**). However, we show that sampling  
197 densities >10% led to unbiased estimations.

198

### 199 Genetic threshold definition for published outbreak datasets

200 For each of the 16 published outbreaks, we applied our framework to estimate an expected  
201 outbreak-specific genetic threshold value (**Figure 5** provides the example of outbreak 11; see  
202 Supplementary appendix figures S1 to S16 for all outbreaks). We found that, for 14 out of 16  
203 outbreaks, the classification of isolates as being outbreak-related or sporadic is consistent with

204 previously reported results. Four of these outbreaks included outliers (outbreaks 1, 4, 12 and  
205 16), which are correctly classified beyond the threshold of exclusion by our model, except for  
206 one isolate of outbreak 4 (**Table 1; Fig S4**; note that outbreak 4 comprised three different co-  
207 contaminating genetic clusters [20]; here the defined outbreak strain was ST528). Ten other  
208 outbreaks (2, 3, 5, 6, 7, 9, 10, 13, 14 and 15) have no sporadic cases, and our framework  
209 correctly clusters all suspected isolates as outbreak-related.

210 For two of the 16 outbreaks, our model leads to different conclusions compared with previous  
211 results. In outbreak 8 (*L. monocytogenes*, beef), two isolates are classified as outliers by our  
212 model, whereas they were initially classified as outbreak-related [24]. In outbreak 11  
213 (*L. monocytogenes*, ox tongue), two isolates came from food and two others from humans.  
214 Our algorithm separates food samples in one cluster and human samples in another cluster,  
215 whereas the isolates were initially grouped based on epidemiological and genetic evidence:  
216 here, the threshold inferred by our model was smaller.

217 When evaluating the influence of outliers on the inferred threshold by removing them from  
218 the analysis we find that, in all cases, the outliers do not affect the outbreak threshold. For  
219 outbreak 1, 4 and 16, this removal does not change the threshold value but improves the fit  
220 between the pairwise SNP distance distribution of the data and the simulated one  
221 (**Supplementary Table S2**).

222

### 223 **Estimation of $D$ and $\mu$ values from real outbreaks, and impact on outbreak definition**

224 For each of the 16 above outbreaks, we used our framework to estimate outbreak duration  $D$   
225 and substitution rate  $\mu$  (called  $D_{estimated}$  and  $\mu_{estimated}$ ) separately, and used these values (instead  
226 of  $D_{lit}$  and  $\mu_{lit}$  used above) for the inference of the genetic distance threshold. Results are  
227 provided in **Table 1**.

228 For 11 of the 16 outbreaks, the estimated HPD intervals include  $D_{lit}$ . For the 5 remaining, we  
229 find higher  $D_{estimated}$  values compared with previously reported  $D_{lit}$  (**Figure S6 and Table 1**).  
230 Regarding  $\mu$ , for nine outbreaks HPD intervals include their corresponding  $\mu_{lit}$ , whereas for  
231 only one outbreak  $\mu_{estimated}$  is lower than  $\mu_{lit}$  (outbreak 2) and the six remaining outbreaks lead  
232 to a higher estimated  $\mu_{estimated}$  compared with  $\mu_{lit}$ . It is important to note that the  $D_{estimated}$  95%  
233 HPD is also higher than  $D_{lit}$  for these same 6 outbreaks (**Table 1**).

234 After reanalysing the outbreaks using our  $D_{estimated}$  and  $\mu_{estimated}$  values, we observe that the  
235 newly obtained thresholds do not affect the attribution of isolates to the outbreak or sporadic  
236 categories in most cases, with three exceptions. First, for outbreak 4, using  $D_{estimated}$  or  $\mu_{estimated}$   
237 increases the threshold from 4 to 11 SNPs, leading to add the previously missing isolate but  
238 still excluding the outliers. Second, for outbreak 15, a decreased genetic threshold (4 SNPs  
239 instead of 5, in both independent estimations analyses for  $D_{estimated}$  and  $\mu_{estimated}$ ) leads to the  
240 exclusion of one isolate. Third, for outbreak 11, the genetic threshold is increased from 4  
241 SNPs to 7 and 10 SNPs (using  $D_{estimated}$  and  $\mu_{estimated}$  respectively), leading to group all isolates  
242 from food and human samples (**Figure 5**). We also observe that in most cases, using the  
243 estimated values of  $D$  and  $\mu$  improves the fit of the genetic distance distribution, with two  
244 exceptions (**Table S2** in the supplementary appendix).

## 245 Discussion

246 Molecular surveillance contributes to identify common exposure to a specific source even  
247 when dates and places of infections are distant [25–27]. Given the large differences existing  
248 among outbreaks, it is being increasingly recognised that no single-species threshold can be  
249 applied to distinguish between outbreak and non-outbreak isolates. To our knowledge,  
250 Octavia and colleagues (2015) were the first to attempt to model the expected genetic distance  
251 among food outbreak isolates. Although the authors incorporated mutation rate and outbreak  
252 duration in their model, they did not use the actual sampling dates. Consequently, their  
253 proposed thresholds depend on strong assumptions as to the actual duration of the outbreak  
254 (referred to as the *ex-vivo/in-vivo* evolution time by these authors). Stimson *et al.* [14]  
255 modelled the number of transmissions that separates infection cases, using a probabilistic  
256 model that incorporates the transmission process in addition to mutation rate and timing of  
257 infections. Because it models between-host transmission, this approach does not apply to  
258 point-source food outbreaks. Lastly, Coll *et al.* [28] aimed at defining a SNP threshold above  
259 which transmission of *S. aureus* between humans can be ruled out, by incorporating the  
260 timing of transmission and within-host diversity. This evolutionary modelling approach  
261 provides a robust SNP cut-off applicable to this specific ecological situation.

262 We propose an original evolutionary approach to the ‘single strain’ threshold conundrum by  
263 incorporating epidemiological and microbiological specifics of each outbreak. Our model is  
264 supported by a high sensitivity (>90%) of isolates classification and by the results of analyses  
265 of 16 real-life published datasets from foodborne outbreaks, which led to consistent results in  
266 most cases and enabled to refine outbreak analysis in two cases.

267 The simulation study showed that our model performed well at grouping outbreak cases. We  
268 also observed that as  $D$  and  $\mu$  increased, the estimated genetic threshold was more accurate:  
269 the model specificity increased with genetic diversity. This is akin to higher resolution typing  
270 methods being better at discriminating related and non-related cases. We also found an impact  
271 of the evolutionary distance between outbreak and sporadic isolates on model specificity,  
272 consistent with the known uncertainty in ruling out sporadic cases for genetically  
273 homogeneous pathogens. In addition, we found that the sampling density is important, as it  
274 influences the number of observed genetic differences: outbreaks with low diversity will  
275 require more samples to capture enough pairwise differences for estimation purposes.

276 Our model assumes a constant population, to avoid increasing execution time with growing  
277 bacterial populations. Because the population  $N$  remains constant over time, this number must  
278 be chosen high enough to capture all the diversity through our sampling process. Indeed, we  
279 simulated the sampling processes and did not analyse the whole  $N$  population. Because  $\lambda$ , the  
280 Poisson parameter, is defined as a function of  $N$ , a number of 500 or 1000 is usually enough  
281 to capture all bacterial diversity, but higher values should be tested further when extreme  
282 substitution rates or duration are explored.

283 In most outbreak investigations, the time since source contamination is unknown, and the  
284 underestimation of  $D$  is a common risk given the possibility of cryptic transmission and  
285 unreported cases having occurred prior to actual outbreak detection [29]. Prior knowledge of  
286  $\mu$  is also subjected to uncertainty: this parameter strongly depends on the species but also on  
287 the strain [30] and on other conditions (*e.g.* temperature, cellular stress). We showed that,  
288 although the estimates were largely consistent with epidemiological information, estimated  $D$   
289 and  $\mu$  were often larger. As  $D$  and  $\mu$  both affect the expected genetic diversity in the same  
290 direction, it is impossible to decide whether it is the rate, or the duration, that was higher than  
291 initially suspected. We suggest that, in the absence of evidence for higher  $\mu$ , fixing it and  
292 estimating  $D$  may provide important clues regarding prior cryptic transmission. Considering  
293 higher  $D$  values than suggested by case recognition is clearly relevant for epidemiological  
294 investigations of outbreaks, as it widens the considered time window and may lead to identify  
295 initially unsuspected sources of contamination.

296 The analysis of the 16 published outbreaks led to the definition of genetic thresholds that were  
297 largely consistent with epidemiological evidence. For outbreaks 4 and 11, groupings were  
298 discordant, as a lower threshold than initially used was inferred by our model. However, when  
299 estimating the duration or substitution rate with our framework, higher values were observed  
300 for both outbreaks, thus leading to group samples consistently with epidemiological evidence.  
301 Outbreak 11 involved foodborne listeriosis with contaminated food where the two food  
302 samples differed by 9 SNPs from the human samples, themselves separated by 2 SNPs. The  
303 two food samples were isolated from two food outlets that had the same meat producer.  
304 Because the incubation period of listeriosis is between 3 and 70 days and because intermittent  
305 *L. monocytogenes* contamination during the production was observed [31], the duration of  
306 contamination  $D$  might have been higher than initially defined, suggesting that the true  
307 common ancestor of food and human isolates was in fact older than initially estimated from  
308 the original publication. This illustrates the value of our estimation framework to inform

309 epidemiological investigations. Interestingly, when using model-estimated duration of  
310 outbreak or substitution rate, we often observed an improved fit of the pairwise distance  
311 distributions (**Table S2**).

312 For outbreak 8, low sequence data quality was observed for three genomes [24], including the  
313 two genomes excluded from the outbreak by our model. Low quality data may have  
314 artificially inflated their genetic distinctness, which underlines the importance of input  
315 sequence data quality.

316 It is important to highlight the following limitations. First, all presented results were generated  
317 by initialising the models with a fully homogeneous ancestral population. However, the  
318 contaminating population may be slightly heterogeneous if it has a non-negligible population  
319 size and had itself already evolved previously. In these cases,  $D$  might be interpreted as  
320 incorporating the diversification time before source contamination. Second, we only modelled  
321 mutation, neglecting other evolutionary processes such as recombination. Detection of  
322 recombination among very closely related isolates is very challenging and its impact would be  
323 limited. However, recombination with genetically distinct co-contaminants might occur and  
324 recombined chromosomal regions should be removed from the analysis, especially when  
325 using SNP-based analyses (by design, MLST moderates the impact of homologous  
326 recombination). Third, the model does not incorporate demographic events within the  
327 contaminated source, including population bottlenecks, which are potentially common in food  
328 processing chains but which would be challenging to infer and to model. Finally, the  
329 framework is designed for a single evolving population derived from a single bacterial  
330 ancestor. When there is more than one contaminating genotype, our framework could be used  
331 separately for each of these.

## 332 **Conclusions**

333 We describe an innovative approach to the ‘single strain’ definition using pathogen genomic  
334 data by considering the most relevant features of specific outbreaks to define a credible  
335 genetic distance threshold. This definition is grounded in evolutionary biology and alleviates  
336 the need for *a priori* defined thresholds, which are not justified theoretically and may be  
337 inappropriate in most cases. The inferred outbreak-tailored genetic thresholds provide a  
338 reliable, non-arbitrary way to define epidemiologically related infection cases and to exclude  
339 non-related sporadic strains. This approach is fast and easy to use. The additional ability to  
340 estimate outbreak duration should also prove useful for point-source disease outbreak studies,

341 by providing a credible temporal window for epidemiological investigations aiming at  
342 identifying and eliminating the sources of contaminations.

343 **Figure legends**

344

345 **Figure 1. Description of the framework.**

346 **A.** Left, threshold computation inputs: genetic distance matrix  $M$ , duration of outbreak  $D$ , set  
347 of sample dates  $S_d$ , number of substitutions per site per year  $\mu$ , and sequence length  $L$  (if based  
348 on nucleotide sites) or number of genes  $g$  (if based on a gene-by-gene approach). Right,  
349 model-based simulation: the algorithm is initialized with a homogenous population of  
350 individuals. At each time step, substitutions are drawn from a Poisson distribution, until  $D$  is  
351 reached. Samples are drawn randomly at the different observed sampling dates. A genetic  
352 threshold is defined using *e.g.*, the 99<sup>th</sup> percentile of the distribution, and clusters of isolates  
353 are derived by single linkage clustering, leading to rule-out non-outbreak isolates.

354 **B.** Left, the same model is used to estimate  $D$  or  $\mu$  using MCMC, based on the following  
355 inputs: the genetic distance matrix; the sampling dates; the sequence length; and either  $\mu$  or  $D$   
356 (depending on which one is estimated).

357

358 **Figure 2. Assessment of the model's ability to classify outbreak isolates from the**  
359 **simulation study.**

360 Specificity (**A**) and sensitivity (**B**) of isolates classification when  $\mu = 8\text{e-}08$  (top) or  $8\text{e-}07$   
361 (bottom) substitutions per site per year. Each point provides specificity or sensitivity computed  
362 from 20 independent outbreaks simulated with the same input parameters, with  $D$  ranging from  
363 50 to 1000 days (x-axis) and  $R_d$  (the ratio of evolution duration between non-outbreak and  
364 outbreak genomes) varying between 4.5 and 150 (colours). (**C**) 95% specificity threshold value  
365 of  $D$  as a function of  $R_d$  (x-axis), computed for 9 values of  $\mu$  (colours).

366

367 **Figure 3. Assessment of the quality of the estimation of  $D$  and  $\mu$  through simulation.**

368 Precision of the estimation of  $D$  (**A**) and  $\mu$  (**B**) from simulated data generated using different  
369 values of  $D$  and  $\mu$ . The sample size, defined as the number of observed samples and  
370 associated dates, was set to  $0.2xD$ . On each panel, the upper banner and red line indicate the  
371 expected  $D$  (**A**) and  $\mu$  (**B**) values used to generate the simulated data. For each of the 240  
372 synthetic outbreaks analysed, three independent MCMC chains were run, and the three



373 corresponding best estimates are shown (points). Vertical bars represent the average values of  
374 the minimum and maximum of the 95% credible interval of the 3 MCMC chains. Each colour  
375 corresponds to distinct values of  $\mu$  or  $D$  used in the simulations (see keys).

376

377 **Figure 4. Impact of sampling density on the precision of the estimation of  $D$  and  $\mu$ .**

378 The position of each symbol represents the difference between the expected and best estimates of  $D$   
379 (A) and  $\mu$  (B) for each of 2400 outbreaks simulated using combinations of 4 values of  $D$  (60, 100, 200  
380 and 400 days; represented in rows) and 3 values of  $\mu$  (2E-07: blue diamonds, 4E-07: orange circles,  
381 6E-07, red triangles; values in substitutions per site per year). Sampling density represents the  
382 percentage of individuals sampled at each time step.

383

384 **Figure 5. Distance threshold derived from the modelling framework, and its effect on clustering:  
385 example of outbreak 11.**

386 Panels A and C show the cgMLST distance distributions: observed distribution (blue, panels A and C),  
387 simulated distribution without estimation (Orange, panel A), and simulated distribution using the  
388 estimated duration of outbreak (red, panel C). Error bars represent the interval of prediction at 95% of  
389 100 simulations. Blue vertical lines correspond to the derived distance threshold defined here as the  
390 99<sup>th</sup> percentile of the distributions (A: from the observed distribution; C: from the simulated  
391 distribution using the estimated duration of outbreak). Panels B and D show the single-linkage clusters  
392 resulting from the derived distance threshold corresponding to panels A and C, respectively.

**Table 1. Analysis of 16 outbreaks from literature.** Genome length  $L$  is given in base pairs (bp), for outbreaks 5 and 8 to 16 the genome length was given by the number of loci  $g$  multiply by the average gene length.  $D_{lit}$  correspond to the duration of outbreak in days deduced from the published articles and  $\mu_{lit}$  is the number of mutations per site per year found in the published article related or found in the literature in general. For each  $\mu_{lit}$  value, the reference used is shown.  $D_{estimated}$  (in days) and  $\mu_{estimated}$  were estimated based on 3 MCMC chains; the associated 95% HPD for all the outbreaks as well as the corresponding genetic threshold is shown. Each threshold results from the 99<sup>th</sup> percentile of a pairwise differences distribution from 100 outbreak simulations.

| Outbreak | Period              | Country          | Bacteria                 | Samples size |      | Source             | Genomic marker | Ref. outbreak | $L$ (bp) | $D_{lit}$ | $\mu_{lit}$ | Ref. $\mu_{lit}$ | $D_{estimated}$          | $\mu_{estimated}$               | Cut-off                         |                       |                         |
|----------|---------------------|------------------|--------------------------|--------------|------|--------------------|----------------|---------------|----------|-----------|-------------|------------------|--------------------------|---------------------------------|---------------------------------|-----------------------|-------------------------|
|          |                     |                  |                          | Human/Animal | Food |                    |                |               |          |           |             |                  |                          |                                 | Using $D_{lit}$ and $\mu_{lit}$ | Using $D_{estimated}$ | Using $\mu_{estimated}$ |
| 1        | Nov. 2016           | Australia        | $SM^2$                   | 13           | 0    | Chocolate mousse   | SNP            | [6]           | 4857450  | 120       | 12E10-7     | [6]              | 95.64<br>(68.73-120.41)  | 1.01e-06<br>(4.83e-07-1.69e-06) | 8                               | 7                     | 7                       |
| 2        | Jan-May 2014        | Australia        | $SM^2$                   | 25           | 0    | Chicken liver pâté | SNP            | [22]          | 4857450  | 20        | 12E10-7     | [6]              | 20.51<br>(20.01-54.7)    | 6.33e-07<br>(2.18e-07-1.09e-06) | 1                               | 1                     | 1                       |
| 3        | Jan-May 2014        | Australia        | $SM^2$                   | 20           | 0    | Hot bread shop     | SNP            | [22]          | 4857450  | 38        | 12E10-7     | [6]              | 44.92<br>(38.8-54.83)    | 1.13e-06<br>(2.78e-07-1.2e-06)  | 2                               | 2                     | 2                       |
| 4        | Oct-Nov 2013        | Australia        | $CJ^3$                   | 7            | 2    | Chicken liver pâté | SNP            | [20]          | 1343000  | 9         | 3.23E10-5   | [32]             | 28.08<br>(16.19-29.99)   | 1.38e-04<br>(9.11e-05-0.000312) | 4                               | 11                    | 11                      |
| 5        | Dec 2002 - Jan 2003 | Finland          | $CJ^3$                   | 2/2          | 2    | Milk               | cgMLST         | [21]          | 1432000  | 65        | 3.23E10-5   | [32]             | 73.07<br>(66.26-95.73)   | 3.53e-05<br>(2.19e-05-3.07e-04) | 16                              | 19                    | 18                      |
| 6        | May-July 2011       | Germany & France | $EC^4$<br><i>O104:H4</i> | 15           | 0    | Sprouts            | SNP            | [19]          | 5437407  | 55        | 2.5E10-6    | [33]             | 107.41<br>(70.33-180.02) | 5.39e-06<br>(1.72e-06-5.90e-06) | 7                               | 13                    | 13                      |
| 7        | 2011                | UK               | $EC^4$ <i>O157</i>       | 10           | 0    | Unwashed           | SNP            | [23]          | 4122236  | 340       | 2.26E10-7   | [34]             | 352.                     | 3.21e-07                        | 2                               | 2                     | 2                       |

|    | vegetables |                |                 |    |    |             |        |      |         |      |          | (340.07-394.00) | (1.16e-07-5.26e-07)          |                                 |    |    |    |
|----|------------|----------------|-----------------|----|----|-------------|--------|------|---------|------|----------|-----------------|------------------------------|---------------------------------|----|----|----|
| 8  | 2012-2013  | B <sup>1</sup> | LM <sup>5</sup> | 5  | 10 | Beef        | cgMLST | [24] | 1462000 | 466  | 4.3E10-7 | [35]            | 494.49<br>(466.09-582.86)    | 2.09e-06<br>(3.44e-07-3.78e-06) | 2  | 2  | 7  |
| 9  | 2007-2013  | B <sup>1</sup> | LM <sup>5</sup> | 5  | 3  | Crabmeat    | cgMLST | [24] | 1732000 | 2200 | 4.3E10-7 | [35]            | 2270.8<br>(2200.54-2569.1)   | 4.83e-07<br>(2.75e-07-9.93e-07) | 12 | 12 | 13 |
| 10 | 2013-2014  | B <sup>1</sup> | LM <sup>5</sup> | 5  | 4  | Sandwiches  | cgMLST | [24] | 1698000 | 289  | 4.3E10-7 | [35]            | 473.51<br>(318.76-499.83)    | 1.05e-06<br>(3.78e-07-3.63e-06) | 2  | 4  | 5  |
| 11 | 2013-2014  | B <sup>1</sup> | LM <sup>5</sup> | 2  | 2  | Ox tongue   | cgMLST | [24] | 1464000 | 943  | 4.3E10-7 | [35]            | 1559.36<br>(1025.81-1599.92) | 1.17e-06<br>(6.22e-07-4.10e-06) | 4  | 7  | 10 |
| 12 | 2009-2011  | B <sup>1</sup> | LM <sup>5</sup> | 9  | 1  | Unknown     | cgMLST | [24] | 1685000 | 783  | 4.3E10-7 | [35]            | 805.65<br>(783.08-888.25)    | 2.46e-07<br>(1.4e-07-4.52e-07)  | 6  | 6  | 4  |
| 13 | 2013       | T <sup>1</sup> | LM <sup>5</sup> | 4  | 1  | Rakfisk     | cgMLST | [24] | 1526000 | 180  | 4.3E10-7 | [35]            | 186.32<br>(76.94-299.33)     | 5.47e-07<br>(8.25e-08-2.98e-06) | 1  | 1  | 1  |
| 14 | 2013-2014  | X <sup>1</sup> | LM <sup>5</sup> | 13 | 6  | Foie gras   | cgMLST | [24] | 1686000 | 161  | 4.3E10-7 | [35]            | 492.69<br>(234.34-499.94)    | 2.91e-06<br>(1.1e-06-4.29e-06)  | 2  | 5  | 8  |
| 15 | 2012       | X <sup>1</sup> | LM <sup>5</sup> | 4  | 9  | Cheese      | cgMLST | [24] | 1698000 | 548  | 4.3E10-7 | [35]            | 384.79<br>(244.07-558.99)    | 3.54e-07<br>(1.53e-07-5.35e-07) | 5  | 4  | 4  |
| 16 | 2012       | C <sup>1</sup> | LM <sup>5</sup> | 25 | 0  | Brie cheese | cgMLST | [24] | 1707000 | 150  | 4.3E10-7 | [35]            | 294.28<br>(252.2-299.99)     | 3.43e-06<br>(1.81e-06-4.3e-06)  | 2  | 3  | 9  |

<sup>1</sup> Country code from the reference article; <sup>2</sup> SM: *Salmonella enterica* serovar *Typhimurium*; <sup>3</sup> CJ: *Campylobacter jejuni*; <sup>4</sup> EC: *Escherichia coli*; <sup>5</sup> LM: *Listeria monocytogenes*

## **Acknowledgements**

We acknowledge the financial support of the MedVetKlebs project, a component of European Joint Programme One Health EP, which has received funding from the European Union Horizon 2020 Research and Innovation Programme (Grant N. 773830). We thank Xavier Didelot and Olivier Tenaillon for critical feedback on an earlier version of the manuscript, and Chiara Crestani for help in manuscript and figures formatting.

## **Authors contributions**

S.B. conceived the presented approach. A.D., L.O. and S.B. designed the model and the computational framework. A.D. programmed the model and analysed data and simulations. A.D., L.O. and S.B. interpreted the results. A.D., L.O. and S.B. wrote the manuscript. The three authors read and approved the final manuscript.

## **Declaration of interests**

All authors report no competing interests.

## References

1. Gerner-Smidt P, Hise K, Kincaid J, Hunter S, Rolando S, Hyttiä-Trees E, et al. PulseNet USA: a five-year update. *Foodborne Pathog Dis.* 2006;3: 9–19. doi:10.1089/fpd.2006.3.9
2. van Belkum A, Tassios PT, Dijkshoorn L, Haeggman S, Cookson B, Fry NK, et al. Guidelines for the validation and application of typing methods for use in bacterial epidemiology. *Clin Microbiol Infect.* 2007;13 Suppl 3: 1–46.
3. Ruan Z, Yu Y, Feng Y. The global dissemination of bacterial infections necessitates the study of reverse genomic epidemiology. *Brief Bioinform.* 2020;21: 741–750. doi:10.1093/bib/bbz010
4. Tenover FC, Arbeit RD, Goering RV, Mickelsen PA, Murray BE, Persing DH, et al. Interpreting chromosomal DNA restriction patterns produced by pulsed-field gel electrophoresis: criteria for bacterial strain typing. *J Clin Microbiol.* 1995;33: 2233–9.
5. Pightling AW, Pettengill JB, Luo Y, Baugher JD, Rand H, Strain E. Interpreting Whole-Genome Sequence Analyses of Foodborne Bacteria for Regulatory Applications and Outbreak Investigations. *Front Microbiol.* 2018;9. doi:10.3389/fmicb.2018.01482
6. Octavia S, Wang Q, Tanaka MM, Kaur S, Sintchenko V, Lan R. Delineating Community Outbreaks of *Salmonella enterica* Serovar Typhimurium by Use of Whole-Genome Sequencing: Insights into Genomic Variability within an Outbreak. *J Clin Microbiol.* 2015;53: 1063–1071. doi:10.1128/JCM.03235-14
7. Schürch AC, Arredondo-Alonso S, Willems RJL, Goering RV. Whole genome sequencing options for bacterial strain typing and epidemiologic analysis based on single nucleotide polymorphism versus gene-by-gene-based approaches. *Clin Microbiol Infect.* 2018;24: 350–354. doi:10.1016/j.cmi.2017.12.016
8. Schürch AC, Siezen RJ. Genomic tracing of epidemics and disease outbreaks. *Microb Biotechnol.* 2010;3: 628–633. doi:10.1111/j.1751-7915.2010.00224.x
9. Reuter S, Ellington MJ, Cartwright EJP, Köser CU, Török ME, Gouliouris T, et al. Rapid bacterial whole-genome sequencing to enhance diagnostic and public health microbiology. *JAMA Intern Med.* 2013;173: 1397–1404. doi:10.1001/jamainternmed.2013.7734
10. Moura A, Tourdjman M, Leclercq A, Hamelin E, Laurent E, Fredriksen N, et al. Real-Time Whole-Genome Sequencing for Surveillance of *Listeria monocytogenes*, France. *Emerg Infect Dis.* 2017;23: 1462–1470. doi:10.3201/eid2309.170336
11. van Belkum A, Tassios PT, Dijkshoorn L, Haeggman S, Cookson B, Fry NK, et al. Guidelines for the validation and application of typing methods for use in bacterial epidemiology. *Clin Microbiol Infect.* 2007;13 Suppl 3: 1–46. doi:10.1111/j.1469-0691.2007.01786.x
12. Schürch AC, Arredondo-Alonso S, Willems RJL, Goering RV. Whole genome sequencing options for bacterial strain typing and epidemiologic analysis based on single nucleotide polymorphism versus gene-by-gene-based approaches. *Clin Microbiol Infect.* 2018;24: 350–354. doi:10.1016/j.cmi.2017.12.016
13. Collineau L, Boerlin P, Carson CA, Chapman B, Fazil A, Hetman B, et al. Integrating Whole-Genome Sequencing Data Into Quantitative Risk Assessment of Foodborne Antimicrobial Resistance: A Review of Opportunities and Challenges. *Front Microbiol.* 2019;10: 1107. doi:10.3389/fmicb.2019.01107

14. Stimson J, Gardy J, Mathema B, Crudu V, Cohen T, Colijn C. Beyond the SNP Threshold: Identifying Outbreak Clusters Using Inferred Transmissions. *Mol Biol Evol.* 2019;36: 587–603. doi:10.1093/molbev/msy242
15. Gordon NC, Pichon B, Golubchik T, Wilson DJ, Paul J, Blanc DS, et al. Whole-Genome Sequencing Reveals the Contribution of Long-Term Carriers in *Staphylococcus aureus* Outbreak Investigation. *J Clin Microbiol.* 2017;55: 2188–2197. doi:10.1128/JCM.00363-17
16. Coll F, Raven KE, Knight GM, Blane B, Harrison EM, Leek D, et al. Definition of a genetic relatedness cutoff to exclude recent transmission of meticillin-resistant *Staphylococcus aureus*: a genomic epidemiology analysis. *Lancet Microbe.* 2020;1: e328–e335. doi:10.1016/S2666-5247(20)30149-X
17. Wright S. Evolution in Mendelian Populations. *Genetics.* 1931;16: 97–159.
18. Fisher RA. XXI.—On the Dominance Ratio. *Proceedings of the Royal Society of Edinburgh.* 1923;42: 321–341. doi:10.1017/S0370164600023993
19. Grad YH, Lipsitch M, Feldgarden M, Arachchi HM, Cerqueira GC, Fitzgerald M, et al. Genomic epidemiology of the *Escherichia coli* O104:H4 outbreaks in Europe, 2011. *Proc Natl Acad Sci USA.* 2012;109: 3065–3070. doi:10.1073/pnas.1121491109
20. Moffatt CRM, Greig A, Valcanis M, Gao W, Seemann T, Howden BP, et al. A large outbreak of *Campylobacter jejuni* infection in a university college caused by chicken liver pâté, Australia, 2013. *Epidemiology & Infection.* 2016;144: 2971–2978. doi:10.1017/S0950268816001187
21. Revez J, Zhang J, Schott T, Kivistö R, Rossi M, Hänninen M-L. Genomic variation between *Campylobacter jejuni* isolates associated with milk-borne-disease outbreaks. *J Clin Microbiol.* 2014;52: 2782–2786. doi:10.1128/JCM.00931-14
22. Phillips A, Sotomayor C, Wang Q, Holmes N, Furlong C, Ward K, et al. Whole genome sequencing of *Salmonella* Typhimurium illuminates distinct outbreaks caused by an endemic multi-locus variable number tandem repeat analysis type in Australia, 2014. *BMC Microbiol.* 2016;16: 211. doi:10.1186/s12866-016-0831-3
23. Holmes A, Allison L, Ward M, Dallman TJ, Clark R, Fawkes A, et al. Utility of Whole-Genome Sequencing of *Escherichia coli* O157 for Outbreak Detection and Epidemiological Surveillance. *J Clin Microbiol.* 2015;53: 3565–3573. doi:10.1128/JCM.01066-15
24. Nielsen EM, Björkman JT, Kiil K, Grant K, Dallman T, Painset A, et al. Closing gaps for performing a risk assessment on *Listeria monocytogenes* in ready-to-eat (RTE) foods: activity 3, the comparison of isolates from different compartments along the food chain, and from humans using whole genome sequencing (WGS) analysis. *EFSA Supporting Publications.* 2017;14: 1151E. doi:10.2903/sp.efsa.2017.EN-1151
25. Laughlin M, Bottichio L, Weiss J, Higa J, McDonald E, Sowadsky R, et al. Multistate outbreak of *Salmonella* Poona infections associated with imported cucumbers, 2015–2016. *Epidemiol Infect.* 2019;147. doi:10.1017/S0950268819001596
26. McCollum JT, Cronquist AB, Silk BJ, Jackson KA, O'Connor KA, Cosgrove S, et al. Multistate Outbreak of Listeriosis Associated with Cantaloupe. *New England Journal of Medicine.* 2013;369: 944–953. doi:10.1056/NEJMoa1215837
27. Multi-country outbreak of *Salmonella* Stanley infections – Third update. *EFSA Supporting Publications.* 2014;11: 592E. doi:10.2903/sp.efsa.2014.EN-592

28. Coll F, Raven KE, Knight GM, Blane B, Harrison EM, Leek D, et al. Definition of a genetic relatedness cutoff to exclude recent transmission of meticillin-resistant *Staphylococcus aureus*: a genomic epidemiology analysis. *The Lancet Microbe*. 2020;1: e328–e335. doi:10.1016/S2666-5247(20)30149-X
29. Perrin A, Larssonneur E, Nicholson AC, Edwards DJ, Gundlach KM, Whitney AM, et al. Evolutionary dynamics and genomic features of the *Elizabethkingia anophelis* 2015 to 2016 Wisconsin outbreak strain. *Nature Communications*. 2017;8: 15483. doi:10.1038/ncomms15483
30. Duchêne S, Holt KE, Weill F-X, Le Hello S, Hawkey J, Edwards DJ, et al. Genome-scale rates of evolutionary change in bacteria. *Microb Genom*. 2016;2. doi:10.1099/mgen.0.000094
31. Lamden KH, Fox AJ, Amar CFL, Little CL. A case of foodborne listeriosis linked to a contaminated food-production process. *Journal of Medical Microbiology*. 2013;62: 1614–1616. doi:10.1099/jmm.0.064055-0
32. Wilson DJ, Gabriel E, Leatherbarrow AJH, Cheesbrough J, Gee S, Bolton E, et al. Rapid Evolution and the Importance of Recombination to the Gastroenteric Pathogen *Campylobacter jejuni*. *Mol Biol Evol*. 2009;26: 385–397. doi:10.1093/molbev/msn264
33. Grad YH, Godfrey P, Cerquiera GC, Mariani-Kurkdjian P, Gouali M, Bingen E, et al. Comparative Genomics of Recent Shiga Toxin-Producing *Escherichia coli* O104:H4: Short-Term Evolution of an Emerging Pathogen. *mBio*. 2013;4. doi:10.1128/mBio.00452-12
34. Reeves PR, Liu B, Zhou Z, Li D, Guo D, Ren Y, et al. Rates of Mutation and Host Transmission for an *Escherichia coli* Clone over 3 Years. *PLoS One*. 2011;6. doi:10.1371/journal.pone.0026907
35. Halbedel S, Prager R, Fuchs S, Trost E, Werner G, Flieger A. Whole-Genome Sequencing of Recent *Listeria monocytogenes* Isolates from Germany Reveals Population Structure and Disease Clusters. *J Clin Microbiol*. 2018;56. doi:10.1128/JCM.00119-18

A

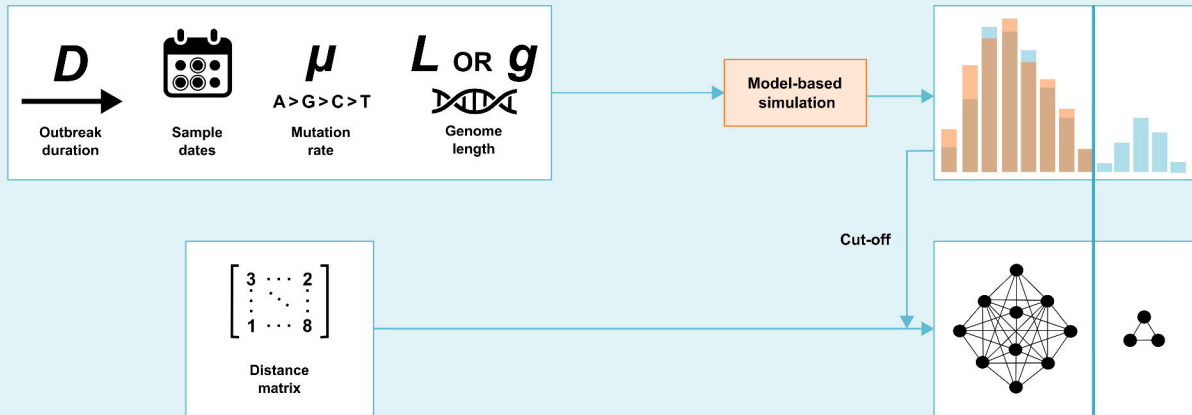

B

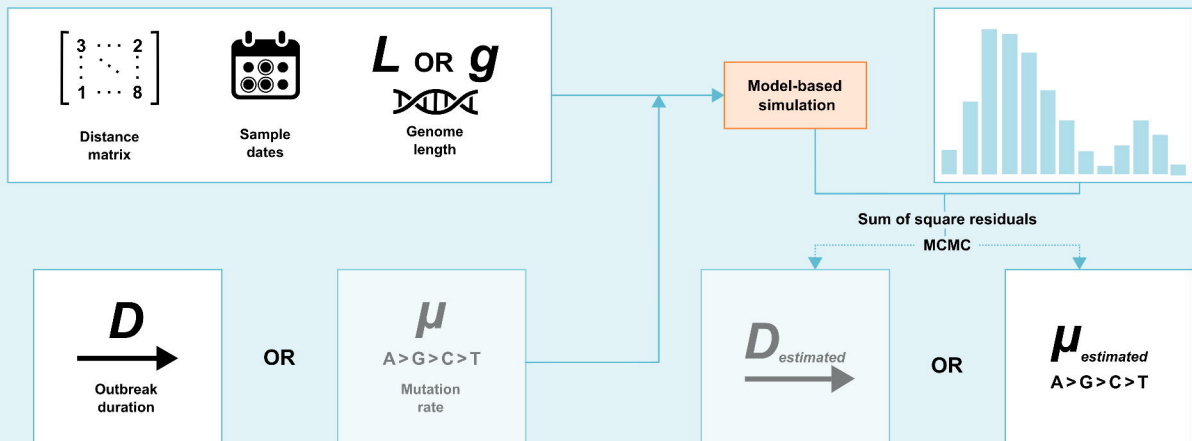



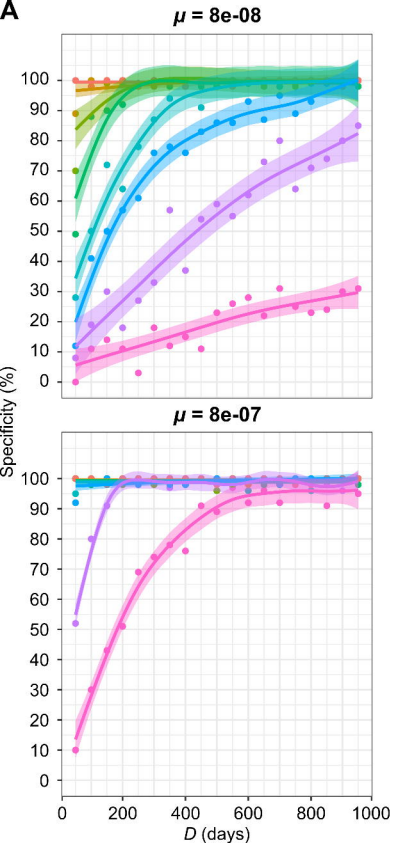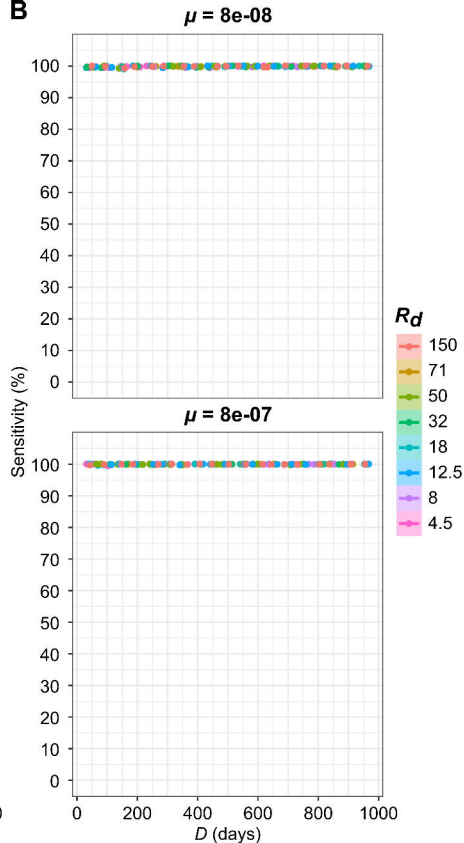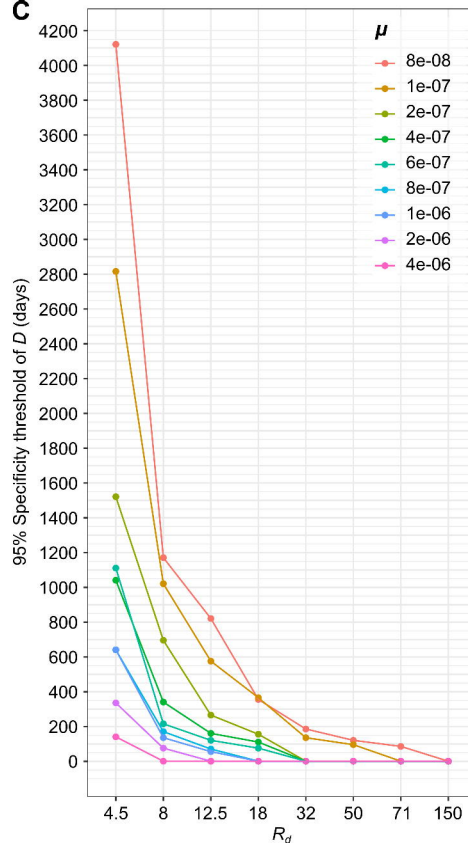

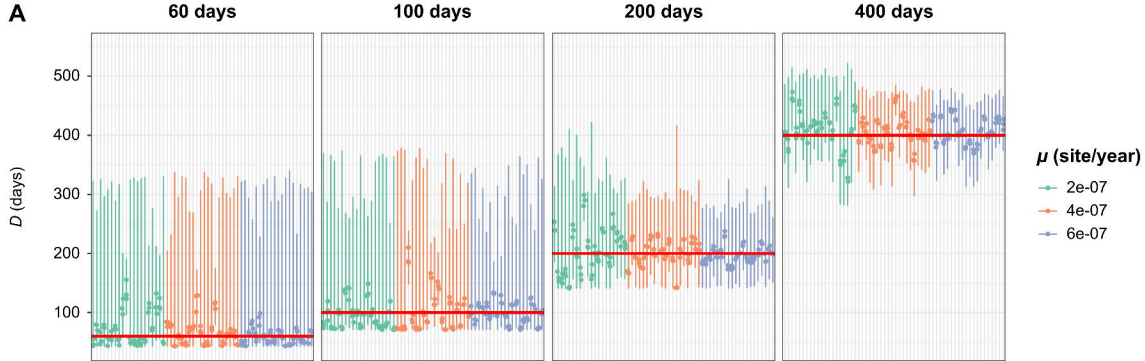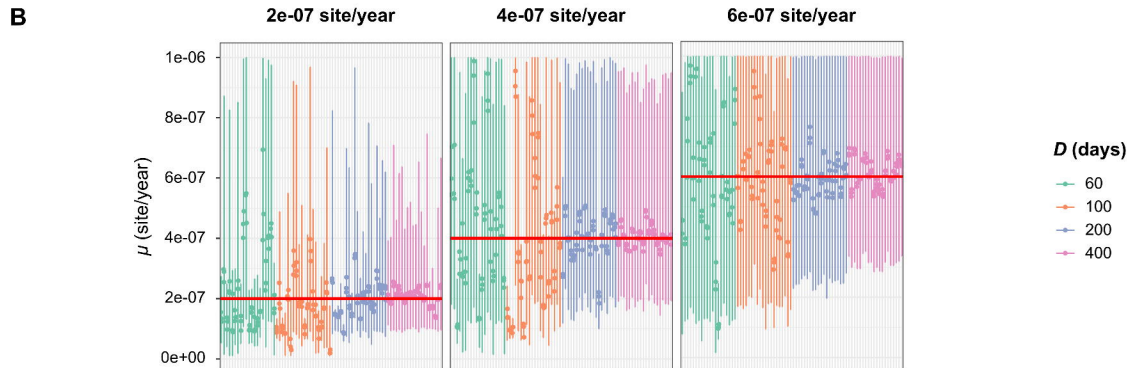

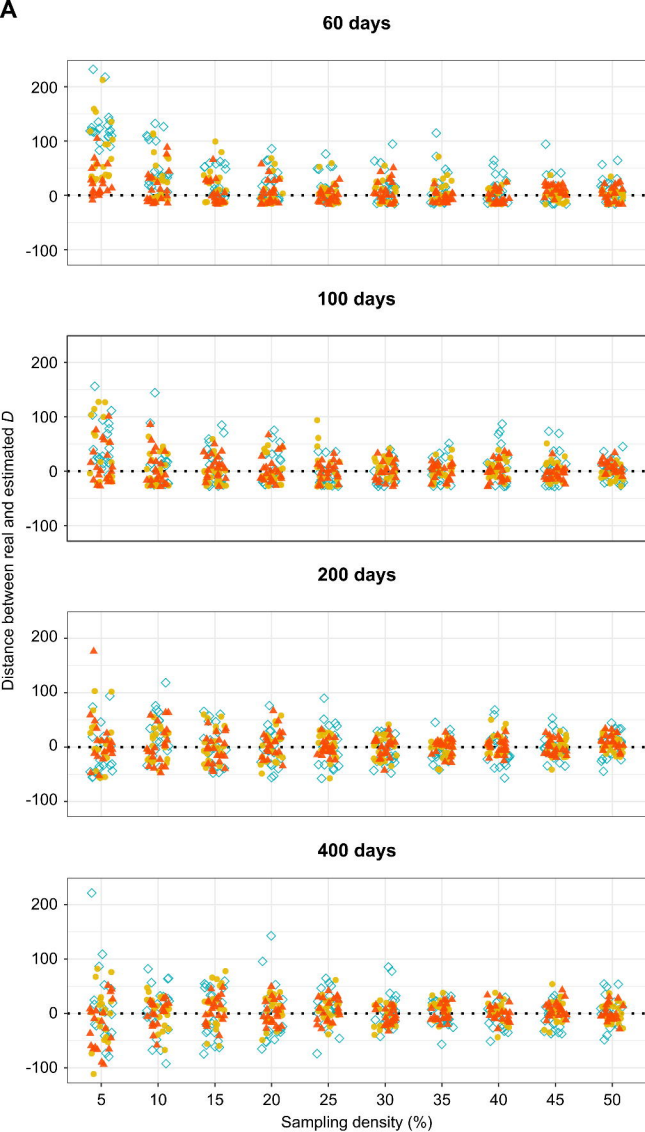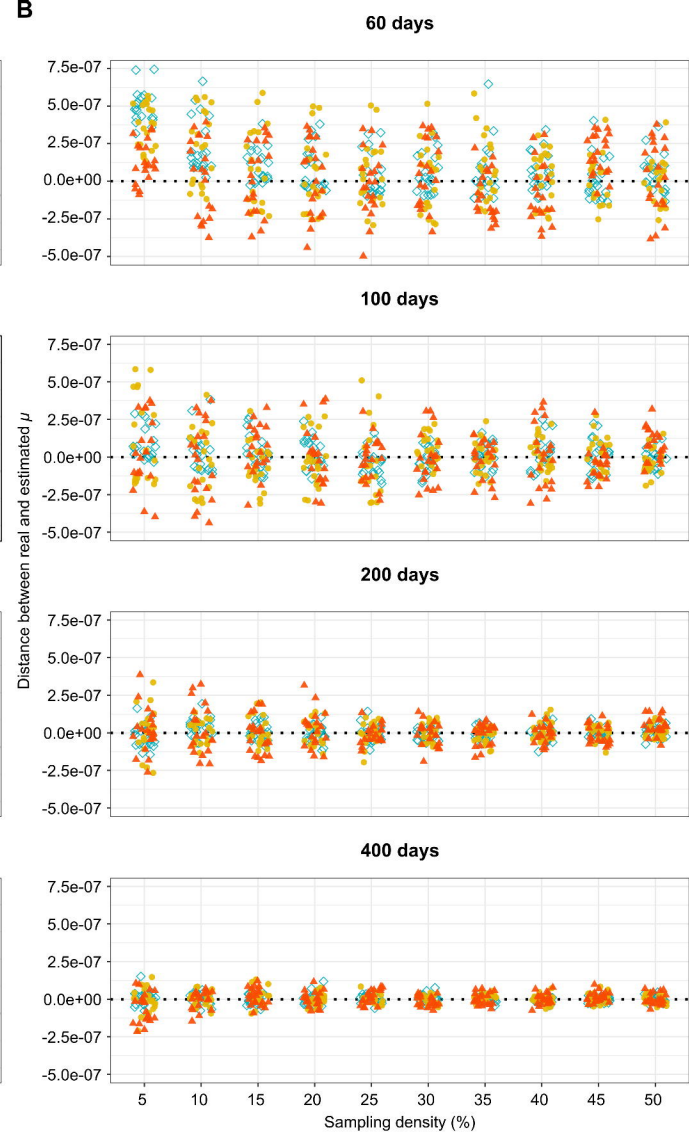

$\mu$  (site/year)

◇ 2e-07

● 4e-07

▲ 6e-07

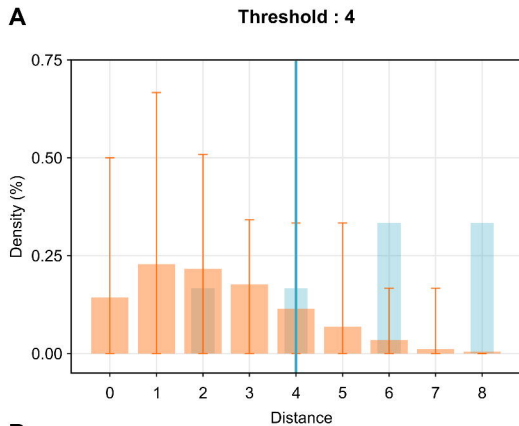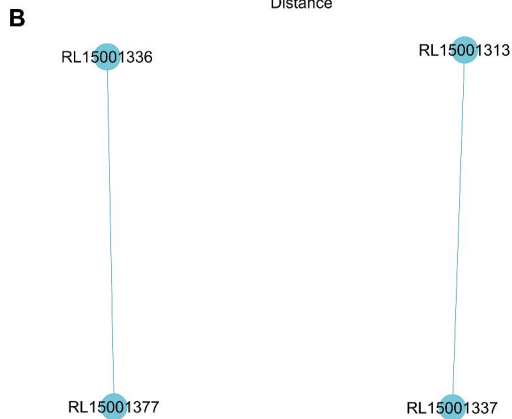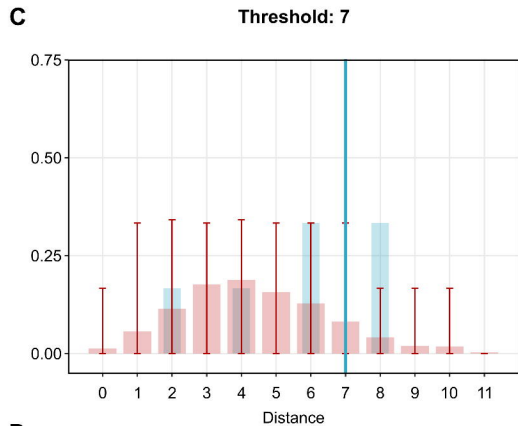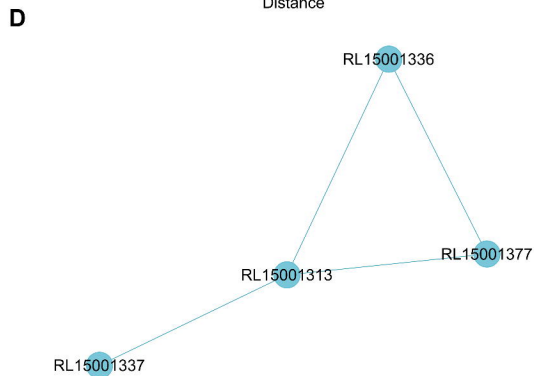

Source: http://biorxiv.org/content/10.1101/2022.02.15.480545v1.full.pdf
